# Supplementary material for: Utilizing mold fermentation to improve the texture and flavor of soy-nut cheese analogs
Source: publisher site journal article supplement (doi:10.1515/ijfe-2025-0094), 2025-08-25
Supplement: Supplementary file 1 [file j_ijfe-2025-0094_suppl_001.docx]

**Supplementary material**

**Utilizing mold fermentation to improve the texture and flavor of soy-nut cheese analogs**

Douyi Chen1, Ziyi Chang1, Peijiao Li, Jiafeng Chen, Xiaomin Qiu, Meiyun Lin Qianwang Zheng*, Zhiwei Ye, Liqiong Guo, Junfang Lin, Yuan Zou*

Department of Bioengineering, College of Food Science, South China Agricultural University, Guangzhou 510642, China

* Corresponding author:

Yuan Zou (zouyuan@scau.edu.cn)

Qianwang Zheng (zhqianw@scau.edu.cn)

1 Douyi Chen and 1 Ziyi Chang are co-first authors. They contributed equally to this work.

# 3. Results and discussion

**Table S1** Relative contents of flavor compounds of unfermented soy-nut cheese analogs.

| Volatile compounds | content（%） |
| --- | --- |
| Esters |  |
| Sulfurous acid, cyclohexylmethyl dodecyl ester | 1.00 ±0.05 |
| (S)-Isopropyl lactate | 0.47±0.54 |
| Octanoic acid, ethyl ester | 1.76±0.16 |
| Decanoic acid, ethyl ester | 1.43±0.31 |
| Tridecanoic acid, methyl ester | 0.07±0.03 |
| Dodecanoic acid, ethyl ester | 0.57±0.04 |
| delta.-Octalactone | 7.10±0.19 |
| gamma.-n-Amylbutyrolactone | 0.13±0.11 |
| delta.-Amylvalerolactone | 4.66±0.24 |
| 2H-Pyran-2-one, 6-heptyltetrahydro- | 0.32±0.01 |
| Phthalic acid, diisobutyl ester | 0.65±0.16 |
| Dibutyl phthalate | 0.13±0.14 |
| Aldehydes |  |
| Hexanal | 7.66±0.11 |
| 2-Heptenal, (Z)- | 2.30±0.06 |
| Nonanal | 9.04±0.37 |
| 2-Octenal, (E)- | 0.94±0.06 |
| Decanal | 1.17±0.05 |
| Benzaldehyde | 16.03±0.48 |
| 2-Nonenal, (E)- | 0.99±0.16 |
| 2,4-Nonadienal, (E,E)- | 0.63±0.31 |
| Ketones |  |
| 2-Nonanone | 1.72±0.06 |
| 3-Octen-2-one | 0.23±0.00 |
| 2-Undecanone | 1.81±0.15 |
| 2-Tridecanone | 0.77±0.21 |
| trans-Geranylacetone | 0.12±0.15 |
| 2(3H)-Furanone, 5-butyldihydro- | 0.15±0.45 |
| Alcohols |  |
| 1-Pentanol | 1.17±0.28 |
| 1-Hexanol | 12.02±0.79 |
| 1-Octen-3-ol | 8.47±0.18 |
| 1-Heptanol | 1.17±0.48 |
| 2-Hepten-1-ol, (E)- | 0.08±0.11 |
| 1-Hexanol, 2-ethyl- | 0.76±0.65 |
| 1-Octanol | 3.37±0.23 |
| 2-Octen-1-ol, (E)- | 0.61±0.29 |
| 1-Nonanol | 1.81±0.05 |
| Benzyl alcohol | 0.68±0.65 |
| Phenylethyl Alcohol | 0.53±0.32 |
| 1-Dodecanol | 0.25±0.28 |
| Acids |  |
| Phosphonic acid, (phydroxyphenyl)- | 0.30±0.17 |
| Octanoic acid | 0.89±0.25 |
| Others |  |
| Hept-2-ene, 2,4,4,6-tetramethyl- | 1.04±0.54 |
| Heptane, 1,1'-oxybis- | 0.37±0.22 |
| Tridecane, 6-methyl- | 0.37±0.51 |
| Tetradecane | 0.79±0.22 |
| 2,4,4,6,6,8,8-Heptamethyl-1-nonene | 0.13±0.21 |
| Heneicosane | 0.18±0.05 |
| Oxime-, methoxy-phenyl-_ | 0.95±0.06 |
| Ethanol, 2-phenoxy- | 1.93±0.23 |
| Hentriacontane | 0.20±0.16 |
| Benzofuran, 2,3-dihydro- | 0.23±0.18 |

**Table S2** Relative contents of flavor compounds of soy-nut cheese analogs fermented with *Mucor wutungkiao* (SNCA-M ) for 5 days.

| Volatile compounds | content（%） |
| --- | --- |
| Esters |  |
| Methyl thiolacetate | 0.34±0.11 |
| Butanethioic acid, S-methyl ester | 0.13±0.23 |
| 2-Butenoic acid, 3-methyl-, ethyl ester | 0.11±0.54 |
| Acetic acid, octyl ester | 0.13±0.18 |
| Octanoic acid, methyl ester | 0.94±0.25 |
| Hexanethioic acid, S-methyl ester | 0.17±0.06 |
| Octanoic acid, ethyl ester | 0.78±0.07 |
| Propyl octanoate | 0.19±0.09 |
| Decanoic acid, ethyl ester | 0.46±0.12 |
| Pentanoic acid, oct-4-yl ester | 0.14±0.06 |
| Dodecanoic acid, methyl ester | 0.26±0.19 |
| Dodecanoic acid, ethyl ester | 0.28±0.19 |
| Ethyl tridecanoate | 0.09±0.02 |
| Pentadecanoic acid, 2,6,10,14-tetramethyl-, methyl ester | 0.70±0.12 |
| Hexanoic acid, 1-cyclopentylethyl ester | 0.27±0.23 |
| Menthyl salicylate | 0.13±0.19 |
| Phthalic acid, butyl tetradecyl ester | 1.87±0.51 |
| Aldehydes |  |
| Hexanal | 0.16±0.12 |
| 2-Heptenal, 2-methyl- | 0.48±0.26 |
| 2-Heptenal, (Z)- | 0.09±0.38 |
| Nonanal | 0.68±0.17 |
| 2-Nonenal | 0.19±0.18 |
| Undecanal | 0.09±0.03 |
| 2,4-Nonadienal | 0.13±0.18 |
| 2,4-Decadienal, (E,E)- | 0.50±0.25 |
| Ketones |  |
| 4-Heptanone | 0.11±0.16 |
| 2-Heptanone | 0.20±0.18 |
| 3-Heptanone, 5-methyl- | 0.65±0.29 |
| 2-Undecanone | 0.37±0.11 |
| Alcohols |  |
| Pentyl alcohol | 0.35±0.19 |
| 2-Heptanol | 0.19±0.02 |
| 1-Hexanol | 0.54±0.03 |
| 3-Octanol | 0.22±0.07 |
| 1-Octen-3-ol | 1.50±0.11 |
| 1-Heptanol | 0.09±0.02 |
| 1-Hexanol, 2-ethyl- | 10.79±2.16 |
| 2,3-Butanediol | 0.12±0.28 |
| Linalol | 0.18±0.10 |
| 1-Octanol | 1.25±0.26 |
| 3-Tetradecanol | 0.14±0.09 |
| 1-Nonanol | 0.59±0.08 |
| 1,3-Propanediol | 0.21±0.12 |
| Phenylethyl Alcohol | 0.66±0.19 |
| Dodecyl alcohol | 0.09±0.02 |
| 2,4-Decadien-1-ol | 0.66±0.04 |
| Acids |  |
| Acetic acid | 0.26±0.19 |
| L-Lactic acid | 0.09±0.06 |
| Heptanoic acid, 2-ethyl- | 0.29±0.21 |
| Octanoic acid | 42.03±5.54 |
| n-Decanoic acid | 8.72±2.29 |
| Dodecanoic acid | 3.77±1.31 |
| Others |  |
| Trimethylamine | 0.15±0.07 |
| Limonene | 0.12±0.02 |
| Furan, 2-pentyl- | 0.18±0.10 |
| Dodecane | 0.15±0.08 |
| Anisole | 0.13±0.03 |
| Dimethyl trisulfide | 0.14±0.02 |
| Tridecane, 6-methyl- | 0.16±0.01 |
| Caryophyllene | 0.94±0.11 |
| 1-Heptene | 0.21±0.13 |
| 2-Ethyl-4,6-dimethyltetrahydropyran | 0.30±0.09 |
| Oxime-, methoxy-phenyl-_ | 2.58±0.24 |
| Phenol | 7.13±1.38 |
| Phenol, 4-ethyl- | 0.27±0.12 |
| 2H-Pyran-2-one, tetrahydro-6-pentyl- | 0.31±0.05 |
| Indole | 4.01±1.04 |

**Table S3** Relative contents of flavor compounds of soy-nut cheese analogs fermented with *Rhizopus oryzae* (SNCA-R) for 5 days.

| Volatile compounds | content（%） |
| --- | --- |
| Esters |  |
| Hexanoic acid, ethyl ester | 0.18±0.01 |
| Hexanoic acid, 2-ethyl-, methyl ester | 0.32±0.07 |
| Octanoic acid, methyl ester | 1.13±0.00 |
| Octanoic acid, ethyl ester | 2.39±1.10 |
| Octanoic acid, 2-methylpropyl ester | 0.09±0.02 |
| Decanoic acid, methyl ester | 0.23±0.08 |
| Decanoic acid, ethyl ester | 0.90±0.06 |
| 1-Methylheptyl acetate | 0.27±0.02 |
| delta.-Caprolactone | 0.07±0.01 |
| Dodecanoic acid, methyl ester | 0.26±0.02 |
| Dodecanoic acid, ethyl ester | 1.20±0.05 |
| Formic acid, heptyl ester | 0.11±0.03 |
| Hexanoic acid, 2-ethyl-3-hydroxy-, methyl ester | 0.39±0.06 |
| delta.-Octalactone | 0.09±0.01 |
| gamma.-Decalactone | 0.09±0.01 |
| delta.-Amylvalerolactone | 0.33±0.00 |
| Aldehydes |  |
| Hexanal | 0.14±0.02 |
| 2-Heptenal, 2-methyl- | 0.63±0.16 |
| 2-Octenal, (E)- | 0.10±0.03 |
| Benzaldehyde | 0.75±0.15 |
| 2-Nonenal, (E)- | 0.58±0.28 |
| 2,4-Nonadienal, (E,E)- | 0.12±0.05 |
| 2-Undecenal | 0.13±0.03 |
| 2,4-Decadienal | 0.09±0.02 |
| 2,4-Decadienal, (E,E)- | 0.38±0.06 |
| Ketones |  |
| 2-Heptanone | 2.01±0.05 |
| 3-Heptanone, 5-methyl- | 0.25±0.11 |
| 3-Octanone | 0.11±0.01 |
| Alcohols |  |
| Pentyl alcohol | 0.60±0.07 |
| Octanal | 12.93±0.76 |
| Nonyl alcohol | 0.05±0.02 |
| 2-Hexanol, 5-methyl- | 0.47±0.17 |
| 1-Hexanol | 1.76±0.09 |
| 3-Octanol | 0.14±0.00 |
| 1-Octen-3-ol | 1.38±0.01 |
| 1-Heptanol | 0.11±0.03 |
| 1-Hexanol, 2-ethyl- | 3.48±0.23 |
| 2,3-Butanediol | 0.64±0.18 |
| 3-Octen-1-ol | 0.12±0.02 |
| 2-Octen-1-ol | 0.06±0.00 |
| 1-Undecanol | 0.58±0.12 |
| 3-Nonen-1-ol, (Z)- | 0.10±0.04 |
| 8-Dodecen-1-ol, (Z)- | 0.10±0.03 |
| 1-Decanol | 0.83±0.05 |
| 4,5-Octanediol, 2,7-dimethyl- | 0.08±0.02 |
| 3-Methyl-1-hexanol | 0.12±0.01 |
| Benzyl alcohol | 2.23±0.13 |
| Phenylethyl Alcohol | 0.96±0.08 |
| Acids |  |
| 2-Ethyl-2,3,3-trimethylbutanoic acid | 0.21±0.01 |
| Propanoic acid, 2-hydroxy-, 1-methylethyl ester, (S)- | 0.05±0.01 |
| Hexanoic acid | 1.82±0.02 |
| Octanoic acid | 44.71±0.78 |
| n-Decanoic acid | 4.76±1.11 |
| Dodecanoic acid | 2.65±0.09 |
| Others |  |
| D-Limonene | 0.16±0.01 |
| Furan, 2-pentyl- | 0.07±0.02 |
| Undecane, 2,9-dimethyl- | 0.10±0.02 |
| Dodecane | 0.13±0.03 |
| Pentadecane | 0.15±0.03 |
| Caryophyllene | 0.89±0.08 |
| 1-Heptene | 0.27±0.03 |
| 2-Ethyl-4,6-dimethyltetrahydropyran | 0.12±0.04 |
| Oxime-, methoxy-phenyl-_ | 0.33±0.12 |
| Phenol | 2.92±0.16 |
| Phenol, 4-ethyl- | 0.15±0.01 |
| Indole | 0.43±0.03 |
| Undecane | 0.07±0.01 |
| 3,5-Dimethyldodecane | 0.11±0.01 |

**Table S4** Relative contents of flavor compounds of soy-nut cheese analogs fermented with *Mucor* *wutungkiao* and *Rhizopus oryzae* (SNCA-M+R ) for 5 days.

| Volatile Compounds | content（%） |
| --- | --- |
| Esters |  |
| Butanethioic acid, S-methyl ester | 0.47±0.08 |
| 2-Butenoic acid, 2-methyl-, ethyl ester | 0.09±0.00 |
| Hexanoic acid, 2-ethyl-, methyl ester | 0.29±0.05 |
| 2-Ethyl-1-hexanol acetate | 0.11±0.01 |
| Formic acid, 2-ethylhexyl ester | 0.10±0.07 |
| Octanoic acid, methyl ester | 0.46±0.09 |
| Methyl 6-methyl heptanoate | 0.62±0.11 |
| Hexanethioic acid, S-methyl ester | 0.13±0.01 |
| Octanoic acid, ethyl ester | 0.95±0.03 |
| Decanoic acid, methyl ester | 0.17±0.03 |
| Decanoic acid, ethyl ester | 0.51±0.09 |
| Decanoic acid, propyl ester | 0.09±0.01 |
| Lauric acid, methyl ester | 0.23±0.03 |
| Lauric acid, ethyl ester | 0.42±0.04 |
| Dodecanoic acid, propyl ester | 0.07±0.01 |
| delta.-Octalactone | 0.08±0.01 |
| delta.-Amylvalerolactone | 0.27±0.03 |
| gamma.-Dodecalactone | 0.12±0.03 |
| delta.-Nonalactone | 0.05±0.00 |
| Phthalic acid, diisobutyl ester | 2.76±0.12 |
| Dibutyl phthalate | 0.17±0.03 |
| Aldehydes |  |
| 2-Heptenal, 2-methyl- | 0.77±0.09 |
| Octanal | 0.07±0.03 |
| 2-Heptenal, (Z)- | 0.07±0.01 |
| 2-Octenal, (E)- | 0.07±0.03 |
| 2-Decenal, (E)- | 0.18±0.06 |
| Undecanal | 0.34±0.05 |
| 2,4-Nonadienal, (E,E)- | 0.10±0.01 |
| 2,4-Decadienal, (E,E)- | 0.36±0.09 |
| Ketones |  |
| 3-Octanone | 0.33±0.03 |
| 3-Heptanone, 5-methyl- | 0.38±0.08 |
| 2-Butanone, 3-hydroxy- | 0.05±0.01 |
| Acetophenone | 0.18±0.06 |
| Alcohols |  |
| 1-Butanol | 0.05±0.01 |
| n-Amyl alcohol | 0.96±0.03 |
| 2-Heptanol | 0.27±0.07 |
| Hexyl alcohol | 0.53±0.04 |
| 3-Octanol | 0.59±0.09 |
| 1-Octen-3-ol | 1.26±0.10 |
| Heptyl alcohol | 0.14±0.03 |
| 4,5-Octanediol, 2,7-dimethyl- | 0.06±0.03 |
| 2-Propyl-1-pentanol | 16.12±2.17 |
| 2,3-Butanediol | 0.06±0.01 |
| beta.-Linalool | 0.21±0.07 |
| 1-Octanol | 2.30±0.14 |
| 1-Nonanol | 0.16±0.01 |
| 5-Dodecanol | 0.20±0.03 |
| Undecyl alcohol | 0.59±0.06 |
| 2-Octen-1-ol | 1.99±0.10 |
| 4-Methyl-2-hexanol | 0.21±0.06 |
| 1-Decanol | 0.13±0.03 |
| Benzyl alcohol | 0.11±0.03 |
| Phenylethyl Alcohol | 0.35±0.01 |
| 1-Dodecanol | 0.13±0.03 |
| 2,4-Decadienol | 0.05±0.00 |
| Acids |  |
| Undec-10-ynoic acid | 0.13±0.03 |
| Octanoic acid | 33.15±3.87 |
| n-Decanoic acid | 6.18±1.14 |
| Dodecanoic acid | 4.52±0.08 |
| Tridecanoic acid | 0.64±0.01 |
| Others |  |
| Disulfide, dimethyl | 0.49±0.08 |
| Undecane, 4,6-dimethyl- | 0.18±0.06 |
| Furan, 2-pentyl- | 0.10±0.01 |
| Dimethyl trisulfide | 0.73±0.08 |
| 5-Tetradecene, (E)- | 0.35±0.01 |
| 3-Methyl-1-heptene | 0.29±0.02 |
| 2-Ethyl-4,6-dimethyltetrahydropyran | 0.34±0.06 |
| Phenol, 2-methoxy- | 0.06±0.01 |
| Phenol | 7.13±2.10 |
| Phenol, 4-ethyl- | 0.23±0.01 |
| Indole | 6.25±1.18 |
| Oleamide | 2.01±0.03 |
